# Supplementary material for: Electrochemical study of fast blue BB. A green strategy for sulfination of fast blue BB
Source: Royal Society of Chemistry journal article supplement (doi:10.1039/c9nj00815b), 2019-01-01

## Supplementary Information

### Electrochemical study of fast blue BB. A green strategy for sulfination of fast blue BB

Mahmood Masoudi Khoram, Davood Nematollahi\*, Mahdi Jamshidi and Hamed Goljani

Faculty of Chemistry, Bu-Ali Sina University, Hamedan, Iran, Zip Code: 65178-38683.

E-mail: [nemat@basu.ac.ir](mailto:nemat@basu.ac.ir), Fax: +98-813-8257407

#### Table of contents

|    |                                                                          |          |
|----|--------------------------------------------------------------------------|----------|
| 1  | $\Delta E$ of cyclic voltammograms of <b>FBBB</b> .....                  | Page S1  |
| 2  | Cyclic voltammogram of <b>FBBB</b> in various scan rates.....            | Page S2  |
| 3  | Cyclic voltammogram of <b>FBBB</b> in various concentrations.....        | Page S4  |
| 4  | Calculation of the electroactive surface of the electrode.....           | Page S6  |
| 5  | FTIR spectrum of <b>3a</b> .....                                         | Page S7  |
| 6  | Mass spectrum of <b>3a</b> .....                                         | Page S8  |
| 7  | $^1\text{H}$ NMR spectrum of <b>3a</b> .....                             | Page S9  |
| 8  | $^1\text{H}$ NMR spectrum of <b>3a</b> (with $\text{D}_2\text{O}$ )..... | Page S10 |
| 9  | $^{13}\text{C}$ NMR spectrum of <b>3a</b> .....                          | Page S11 |
| 10 | FTIR spectrum of <b>3b</b> .....                                         | Page S12 |
| 11 | Mass spectrum of <b>3b</b> .....                                         | Page S13 |
| 12 | $^1\text{H}$ NMR spectrum of <b>3b</b> .....                             | Page S14 |
| 13 | $^{13}\text{C}$ NMR spectrum of <b>3b</b> .....                          | Page S15 |
| 14 | FTIR spectrum of <b>3c</b> .....                                         | Page S16 |
| 15 | Mass spectrum of <b>3c</b> .....                                         | Page S17 |
| 16 | $^1\text{H}$ NMR spectrum of <b>3c</b> .....                             | Page S18 |
| 17 | $^{13}\text{C}$ NMR spectrum of <b>3c</b> .....                          | Page S19 |

**Table 1:**  $\Delta E$  obtained from cyclic voltammogram of 1 mM **FBBB**, in water (different pH values/ethanol mixture) (70/30, v/v). Scan rate: 10 mV/s. Temperature =  $25 \pm 1$  °C.

|                                |       |       |       |       |       |       |       |       |       |       |       |
|--------------------------------|-------|-------|-------|-------|-------|-------|-------|-------|-------|-------|-------|
| <b>pH</b>                      | 1.0   | 1.6   | 2.4   | 3.3   | 4.1   | 5.0   | 6.0   | 6.9   | 7.8   | 9.7   | 10.9  |
| <b><math>\Delta E/V</math></b> | 0.037 | 0.039 | 0.056 | 0.074 | 0.115 | 0.177 | 0.267 | 0.272 | 0.314 | 0.364 | 0.375 |

Effect of scan rate on cyclic voltammogram of **FBBB** in various pH values

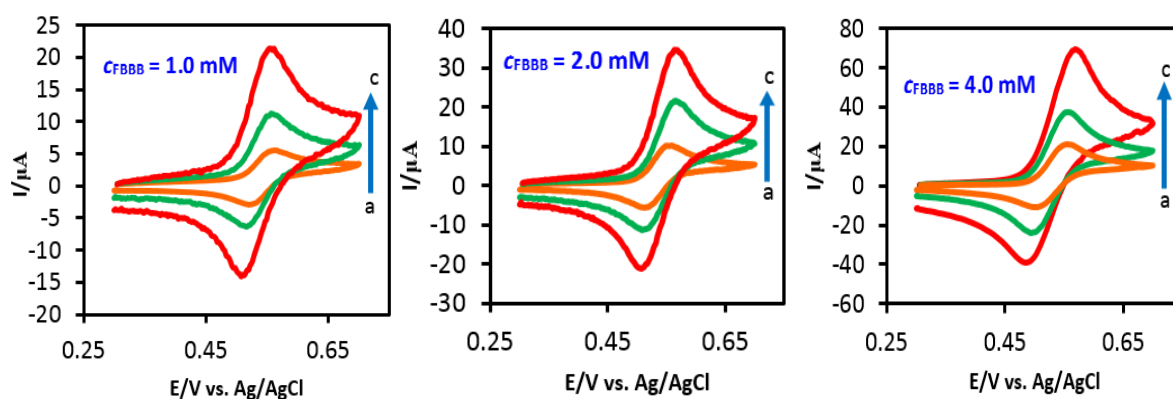

Cyclic voltammograms of different amounts of **FBBB** (1.0, 2.0 and 4.0 mM) in various scan rates at glassy carbon electrode, in water (perchloric acid, 0.1 M)/ethanol mixture (70/30, v/v). Scan rate: (a) 25 mV/s, (b) 100 mV/s and (c) 300 mV/s. Temperature =  $25 \pm 1$  °C.

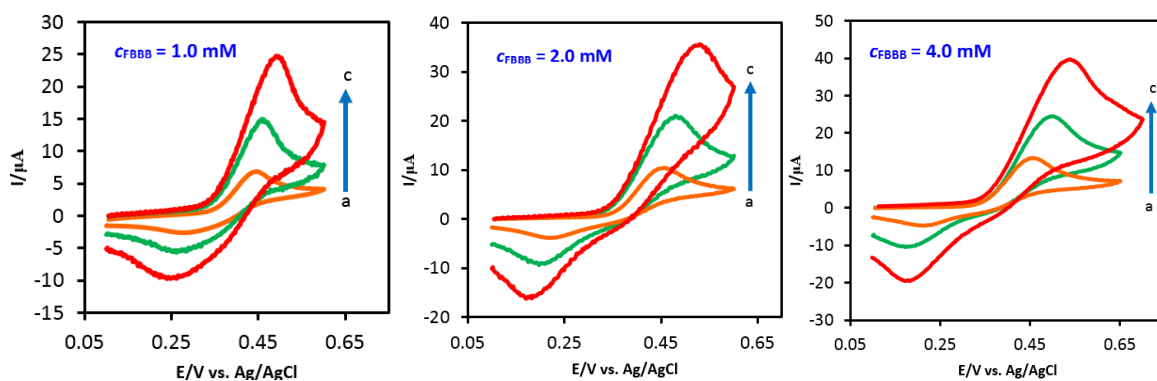

Cyclic voltammograms of different amounts of **FBBB** (1.0, 2.0 and 4.0 mM) in various scan rates at glassy carbon electrode, in acetate buffer ( $c = 0.2$  M,  $\text{pH} = 4.0$ ) /ethanol mixture (70/30, v/v). Scan rate: (a) 25 mV/s, (b) 100 mV/s and (c) 300 mV/s. Temperature =  $25 \pm 1$  °C.

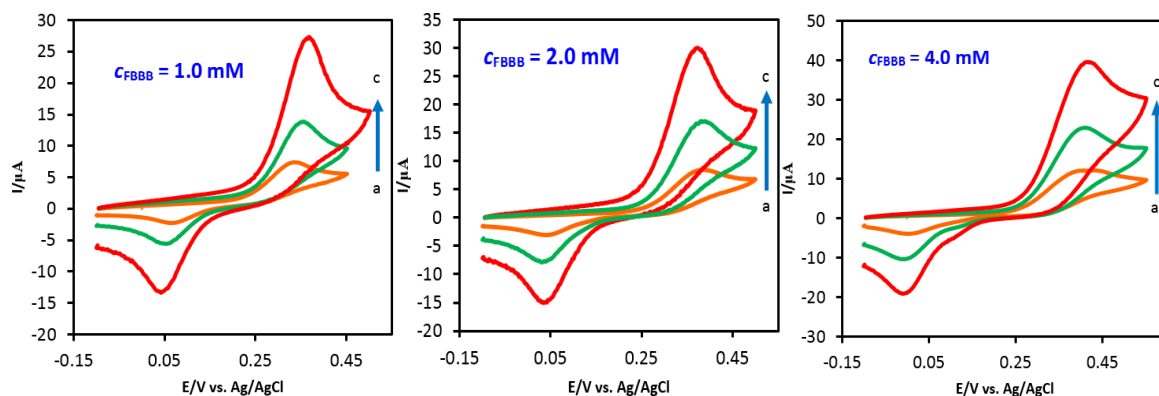

Cyclic voltammograms of different amounts of **FBBB** (1.0, 2.0 and 4.0 mM) in various scan rates at glassy carbon electrode, in water (phosphate buffer,  $c = 0.2$  M,  $\text{pH} = 7.0$ )/ethanol mixture (70/30, v/v). Scan rate: (a) 25 mV/s, (b) 100 mV/s and (c) 300 mV/s. Temperature =  $25 \pm 1$  °C.

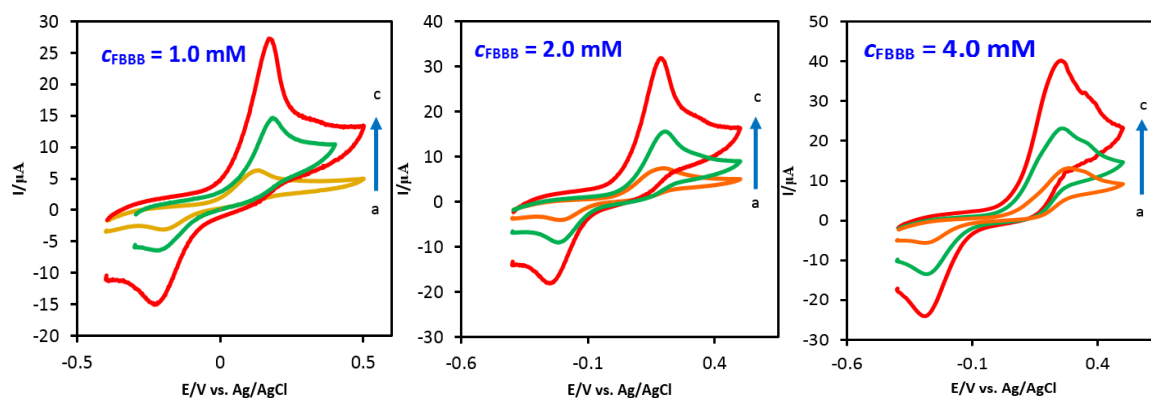

Cyclic voltammograms of different amounts of **FBBB** (1.0, 2.0 and 4.0 mM) in various scan rates at glassy carbon electrode, in water (carbonate buffer,  $c=0.2$ ,  $\text{pH}=11$ )/ethanol mixture (70/30, v/v). Scan rate: (a) 25 mV/s, (b) 100 mV/s and (c) 300 mV/s. Temperature =  $25 \pm 1$  °C.

### Effect of **FBBB** concentration on cyclic voltammograms in various pH values

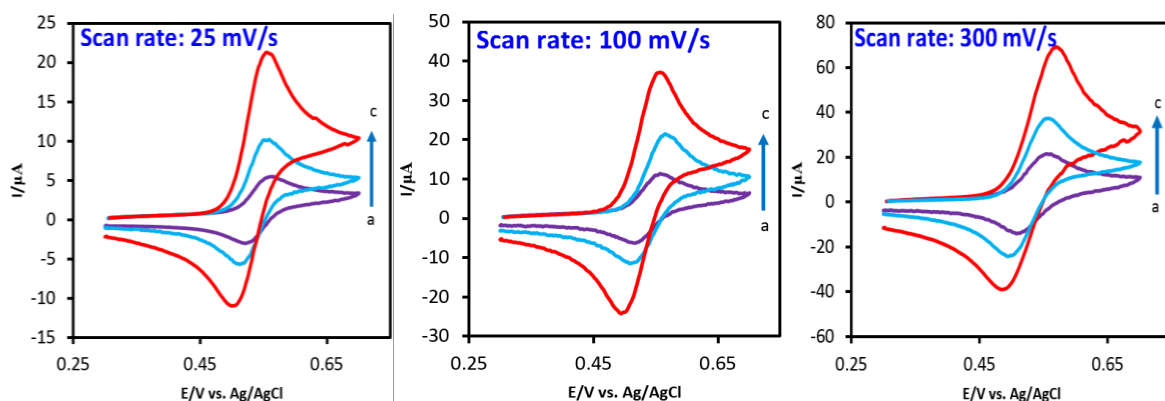

Cyclic voltammograms of **FBBB** in various concentrations at glassy carbon electrode, in water (perchloric acid, 0.1 M)/ethanol mixture (70/30, v/v). **FBBB** concentration: (a) 1 mM, (b) 2 mM and (c) 3 mM. Temperature =  $25 \pm 1$  °C.

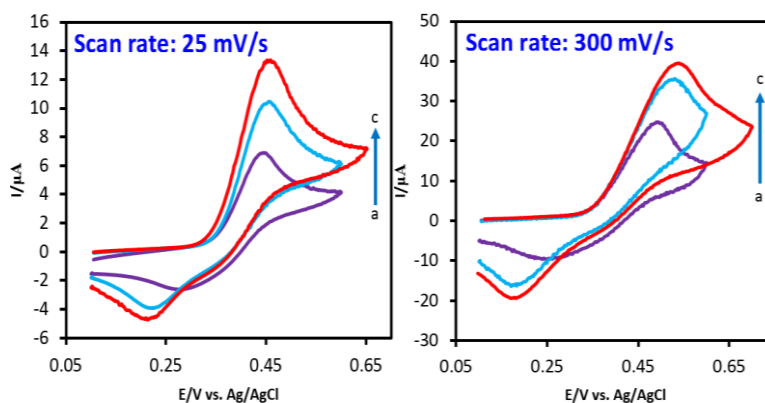

Cyclic voltammograms of **FBBB** in various concentrations at glassy carbon electrode, in acetate buffer ( $c = 0.2$  M, pH = 4.0)/ethanol mixture (70/30, v/v). **FBBB** concentration: (a) 1 mM, (b) 2 mM and (c) 3 mM. Temperature =  $25 \pm 1$  °C.

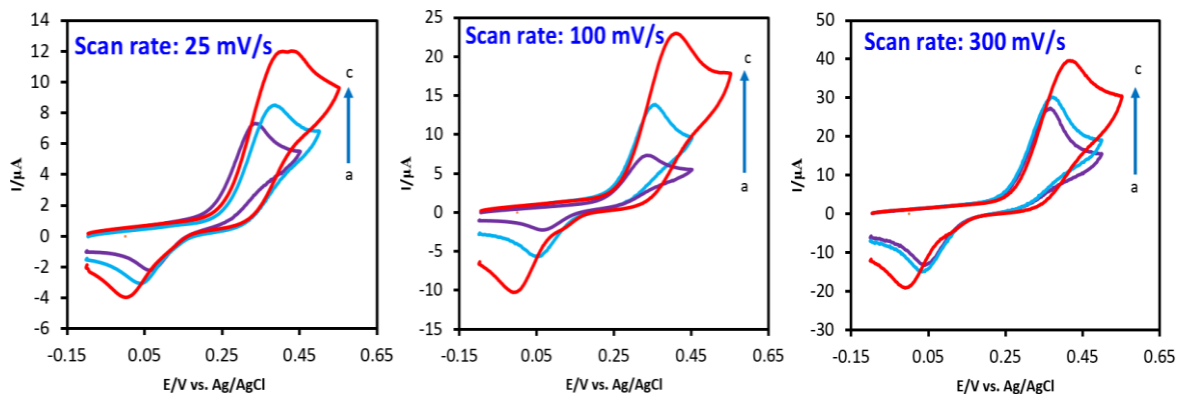

Cyclic voltammograms of **FBBB** in various concentrations at glassy carbon electrode in water (phosphate buffer,  $c = 0.2$  M,  $\text{pH} = 7.0$ )/ethanol mixture (70/30, v/v). **FBBB** concentration: (a) 1 mM, (b) 2 mM and (c) 3 mM. Temperature =  $25 \pm 1$  °C.

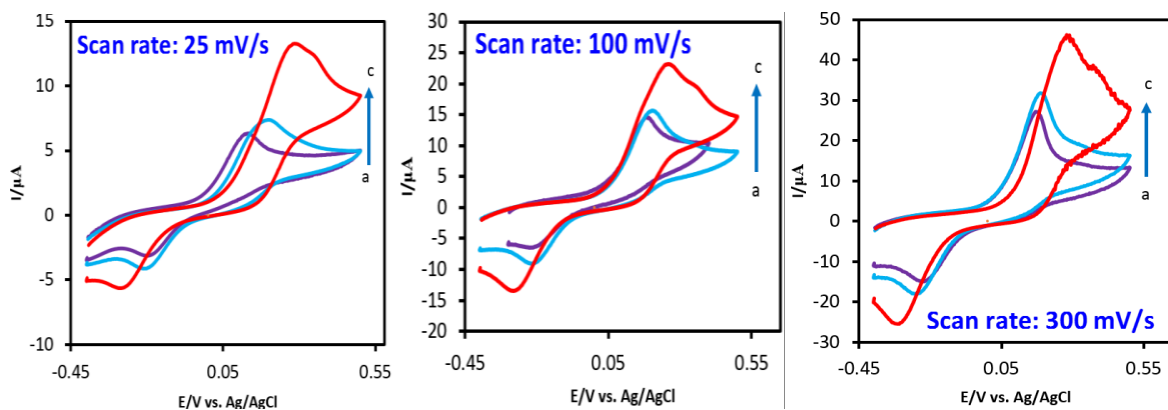

Cyclic voltammograms of **FBBB** in various concentrations at glassy carbon electrode in water (carbonate buffer,  $c = 0.2$ ,  $\text{pH} = 11$ )/ethanol mixture (70/30, v/v). **FBBB** concentration: (a) 1 mM, (b) 2 mM and (c) 3 mM. Temperature =  $25 \pm 1$  °C.

The diffusion coefficient of **FBBB** was calculated using randles-sevcik equation:

$$i_p = (2.69 \times 10^5) n^{\frac{3}{2}} A D_0^{\frac{1}{2}} C_{ox}^* v^{\frac{1}{2}}$$

$$i_p = k v^{\frac{1}{2}}$$

To reach this goal, the linear sweep voltammograms of a solution containing 32 mg (1 mM)  $K_3[Fe(CN)_6]$  in 0.5 M of KCl were recorded at several scan rates and then  $I_p$  vs.  $v^{\frac{1}{2}}$  was plotted.

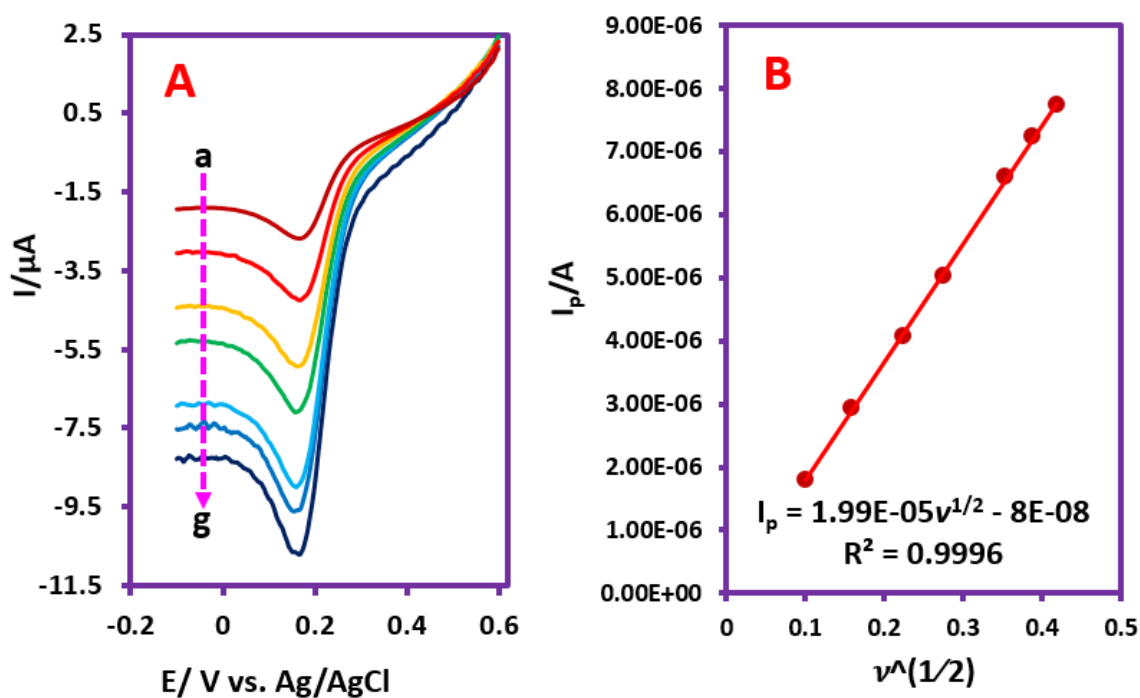

A) Linear sweep voltammograms of 1 mM  $K_3[Fe(CN)_6]$  in KCl (0.5 M), in various scan rate at glassy carbon electrode. Scan rate from a to g: 10, 25, 50, 75, 125, 150 and 175 mV/s. B) The plot of  $I$  vs.  $v^{1/2}$ . Temperature =  $25 \pm 1$  °C.

The slope ( $k$ ) of the line is equal to:  $1.99 \times 10^{-5}$

$$\text{Slope} = (2.69 \times 10^5) n^{\frac{3}{2}} A D_0^{\frac{1}{2}} C_{ox}^* = 1.99 \times 10^{-5}$$

In randles-sevcik equation,  $D$  is the diffusion coefficient ( $7.6 \times 10^{-6}$ ),  $n$  is the number of the electron,  $A$  is the electroactive surface and  $C_{ox}^*$  is the  $K_3[Fe(CN)_6]$  concentration.

$$1.99 \times 10^{-5} = (2.69 \times 10^5) (1)^{\frac{3}{2}} A (7.6 \times 10^{-6})^{\frac{1}{2}} (10^{-6})$$

$$A = 0.026 \text{ cm}^2$$

M. J. A. Shiddiky, A. A. J. Torriero, C. Zhao, I. Burgar, G. Kennedy, and A. M. Bond, J. Am. Chem. Soc., 2009, 131, 7976- 7989

FTIR spectrum of **3a**

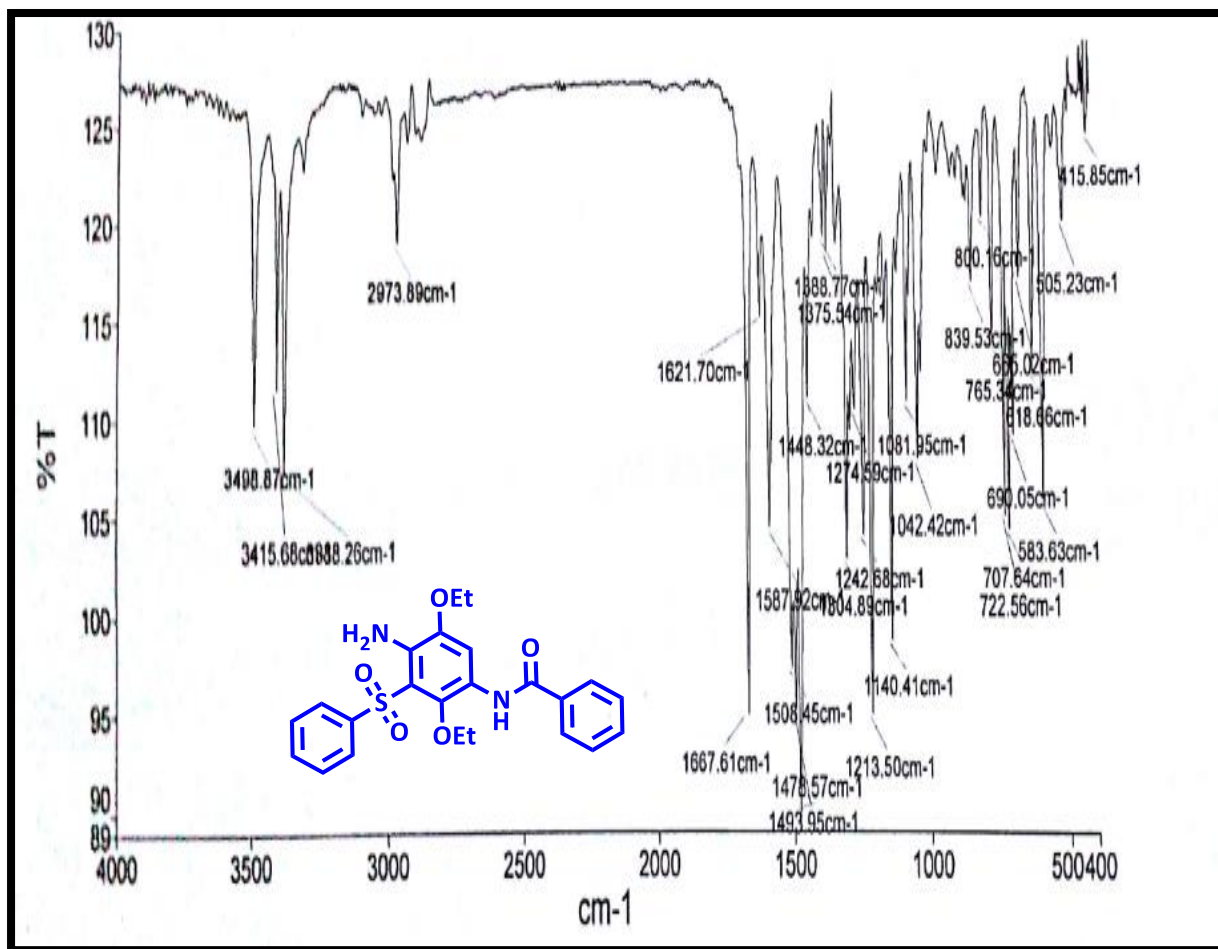



Mass spectrum of **3a**

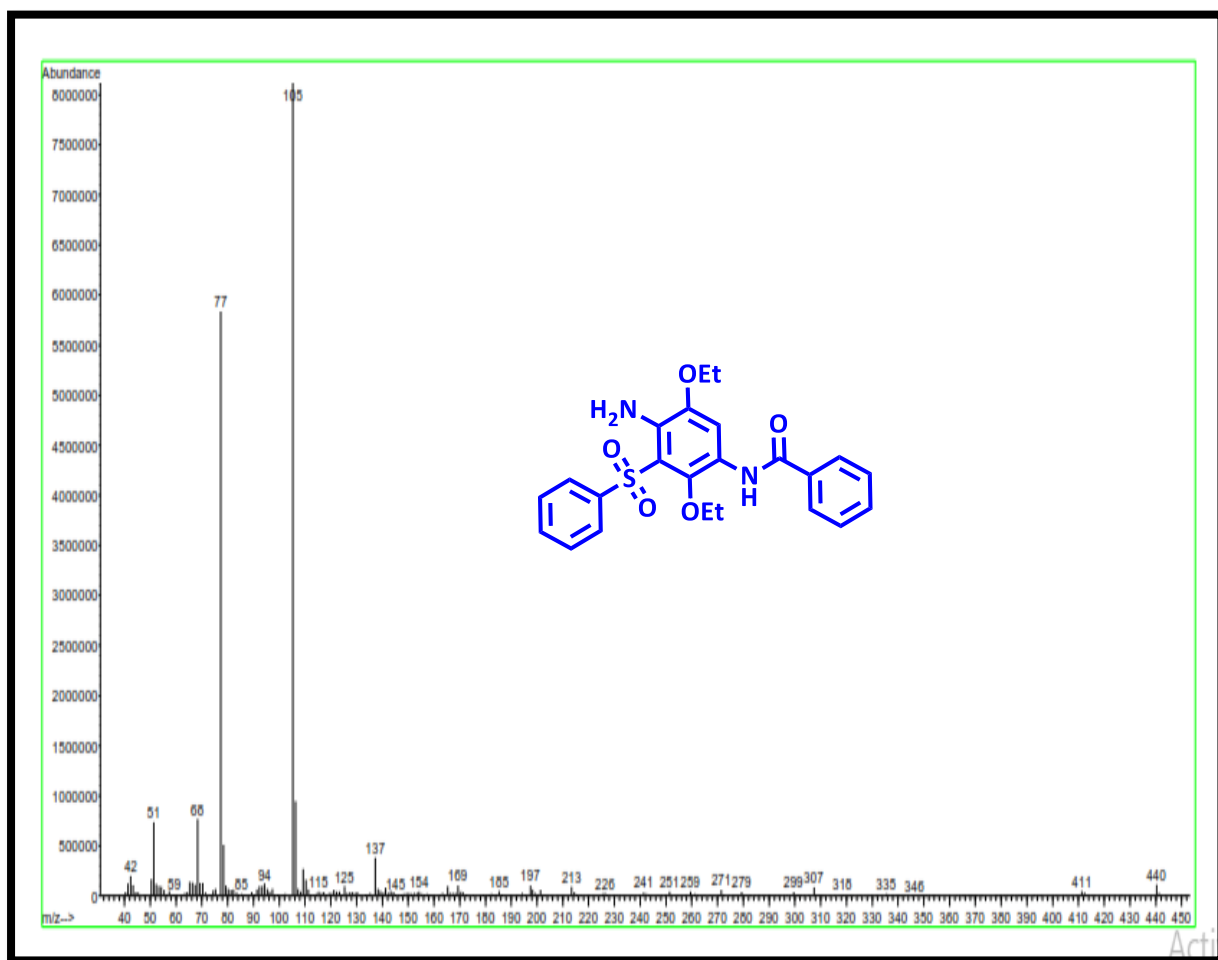

<sup>1</sup>H NMR spectrum of **3a**

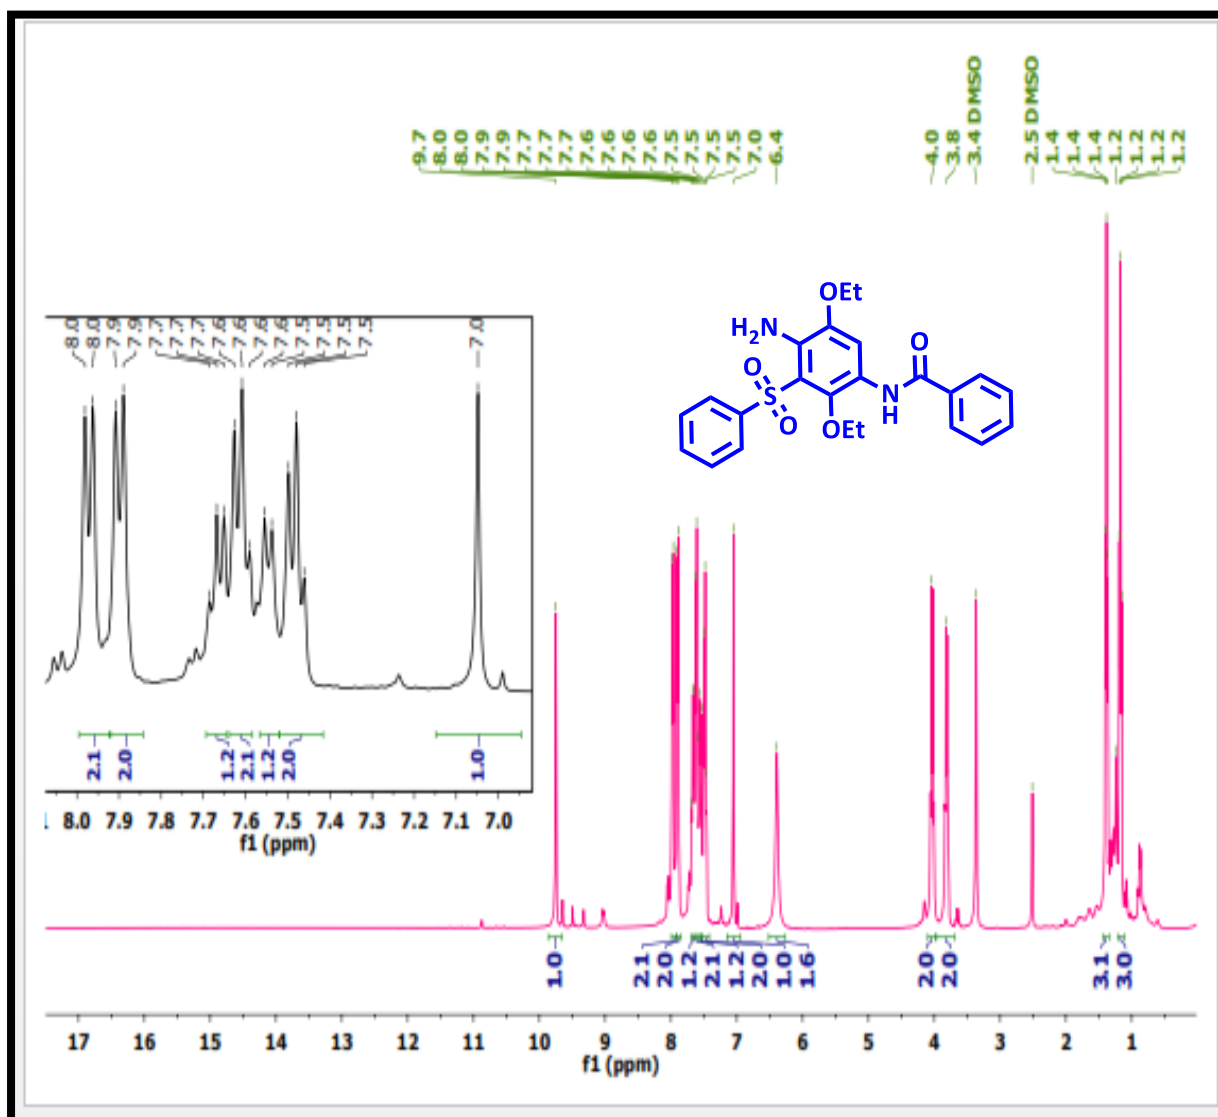

$^1\text{H}$  NMR spectrum of **3a** (with  $\text{D}_2\text{O}$ )

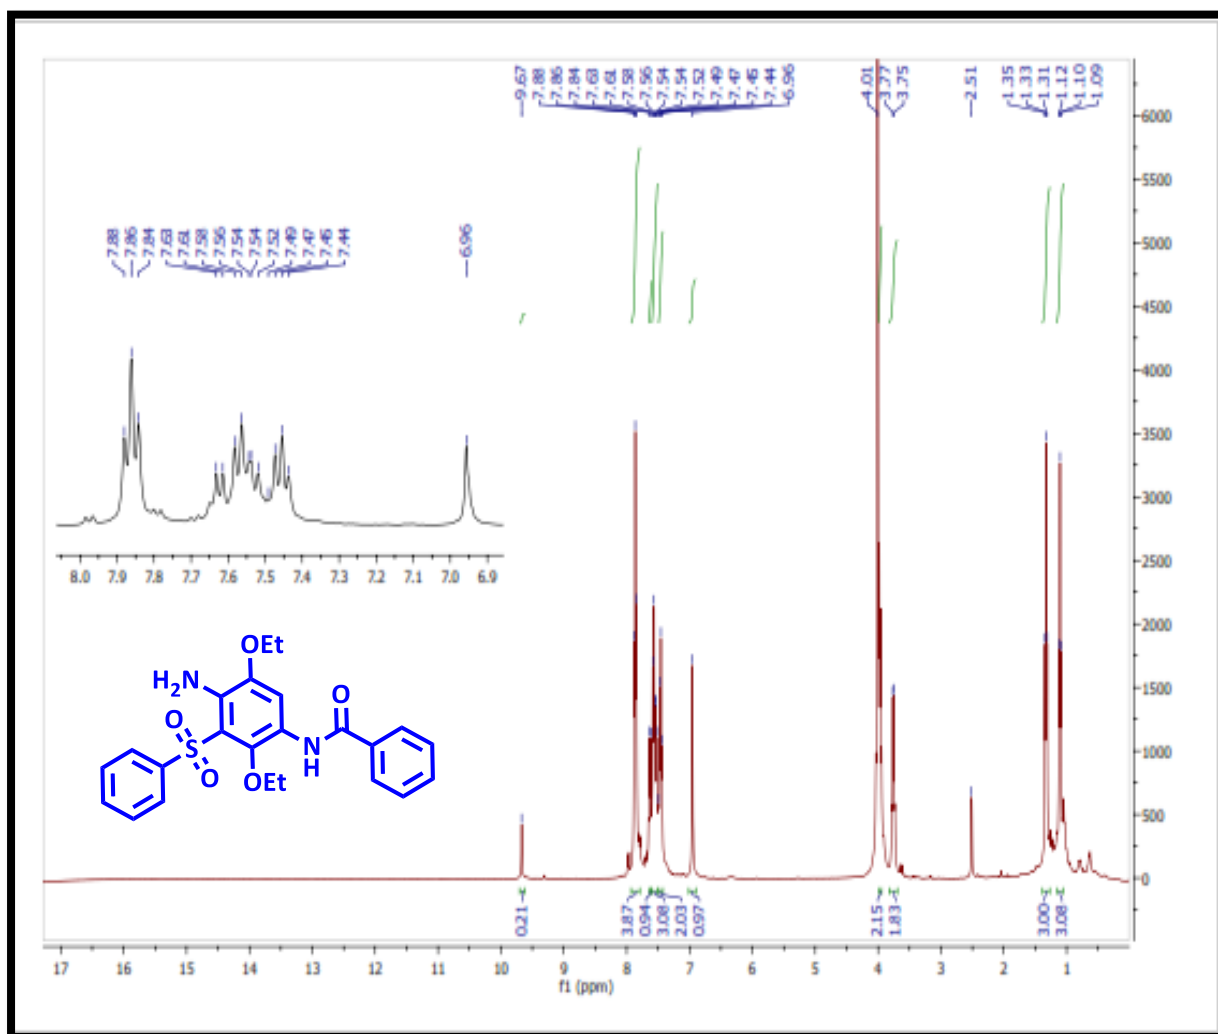

<sup>13</sup>C NMR spectrum of **3a**

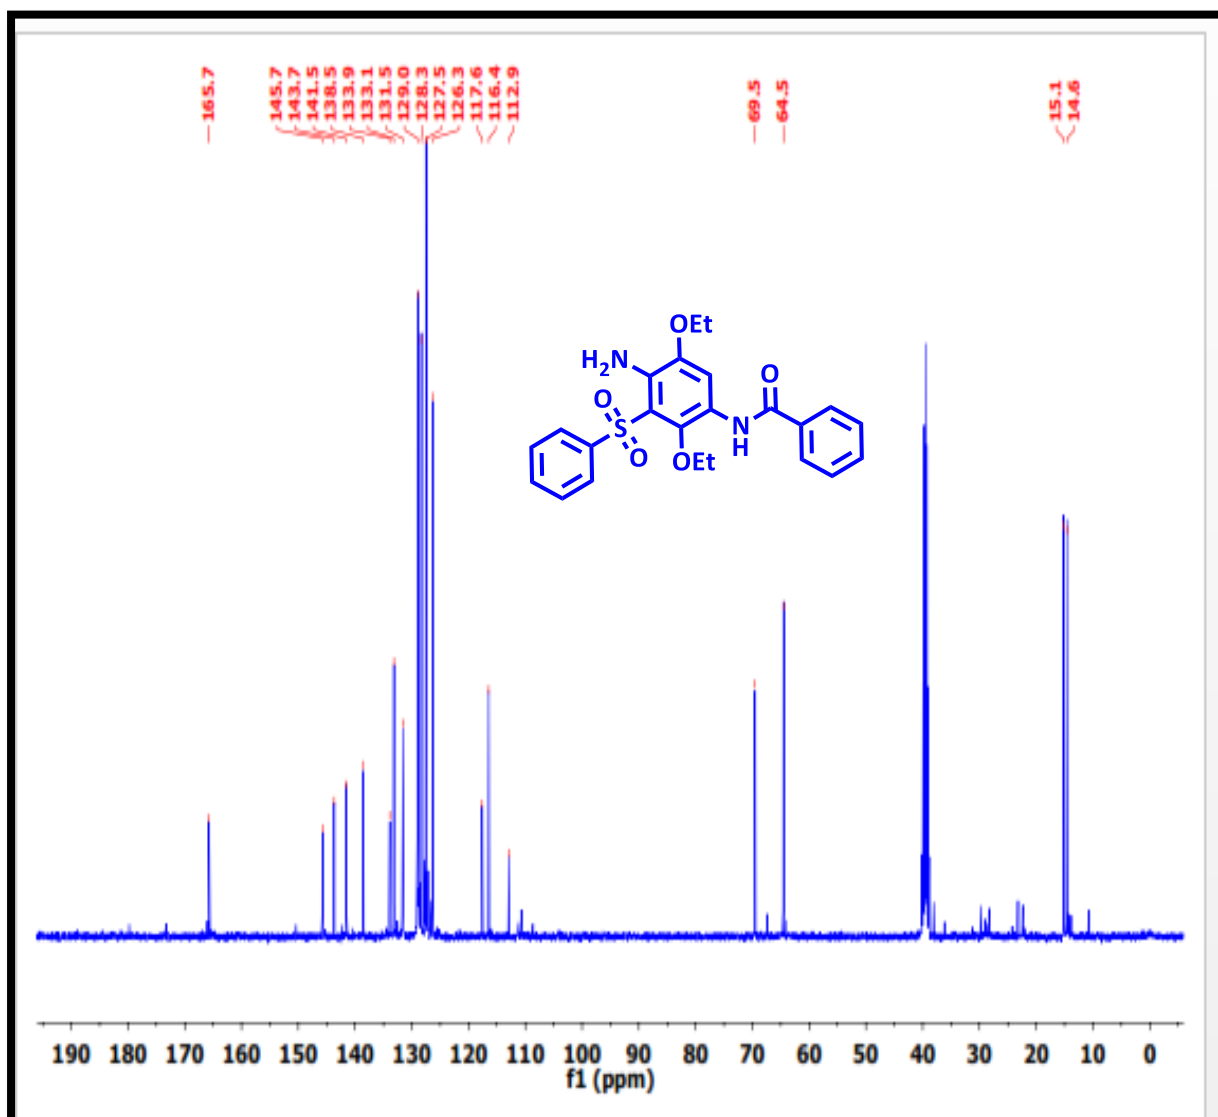

FTIR spectrum of **3b**

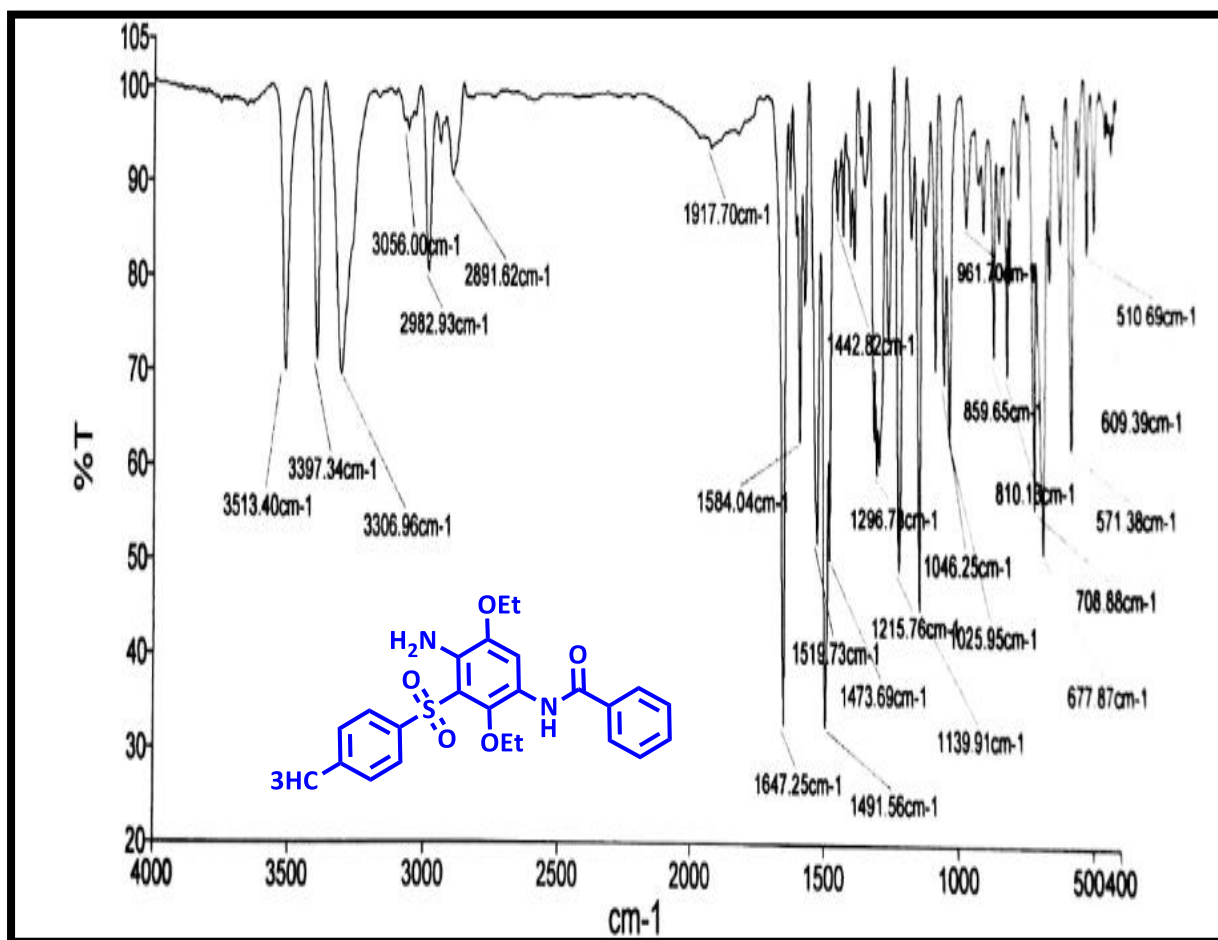

# Mass spectrum of **3b**

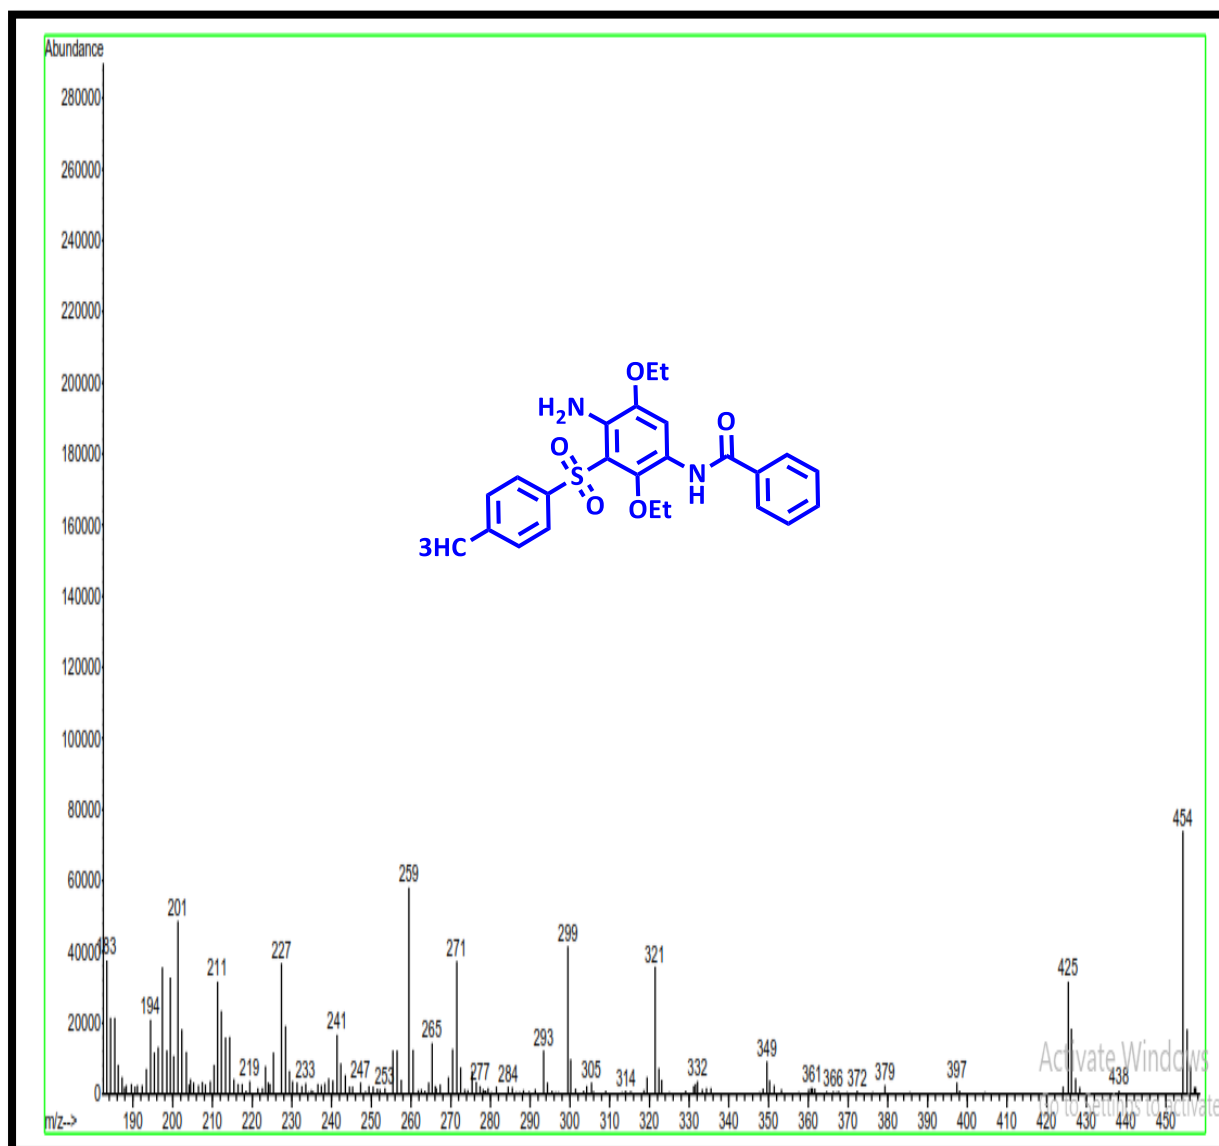

<sup>1</sup>H NMR spectrum of **3b**

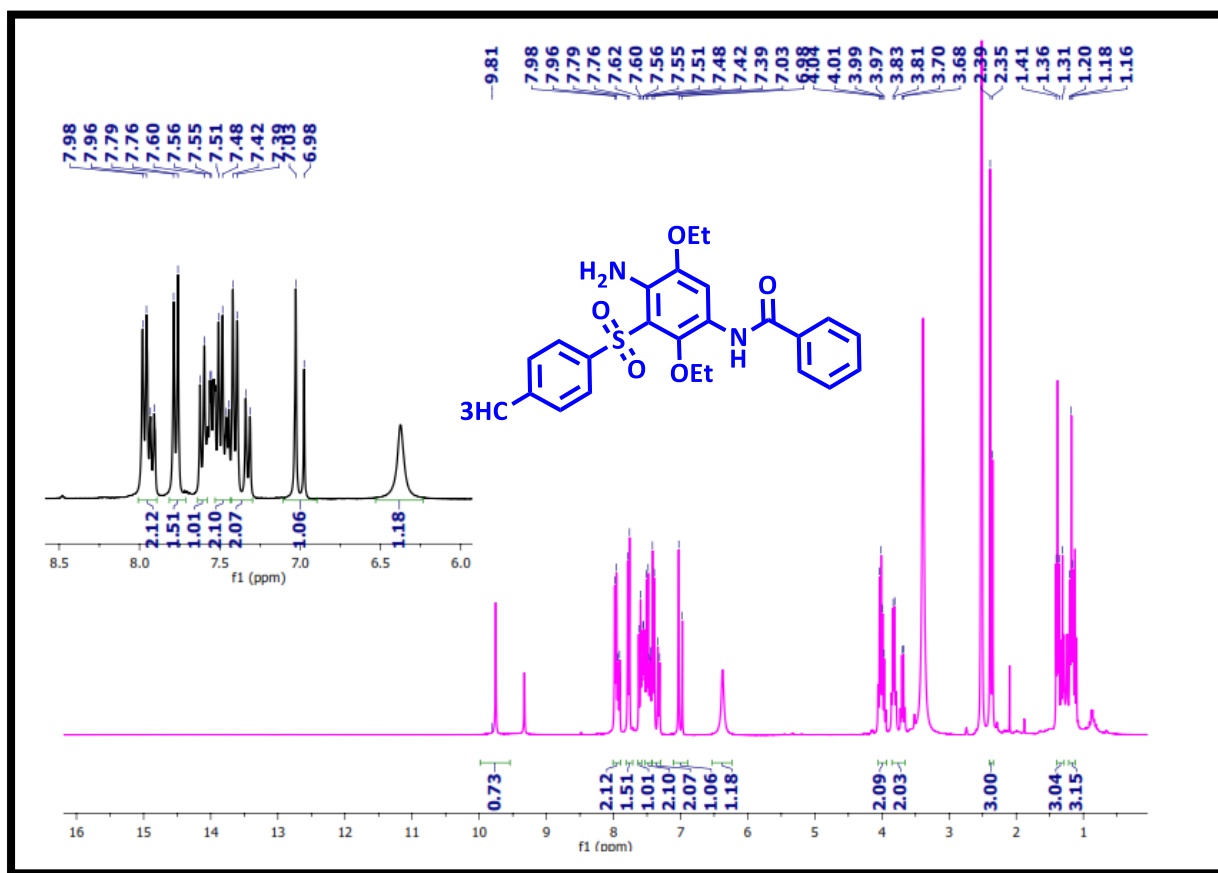

$^{13}\text{C}$  NMR spectrum of **3b**

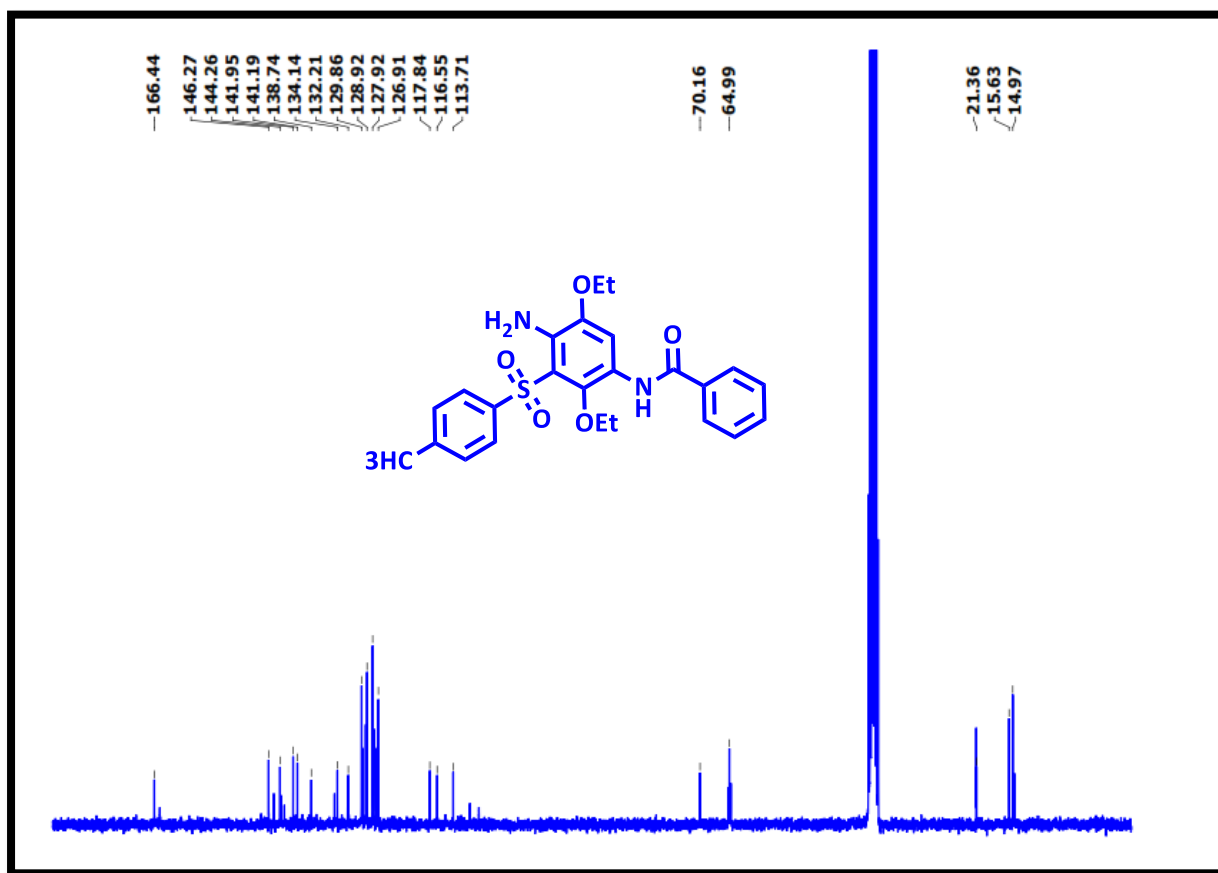



FTIR spectrum of **3c**

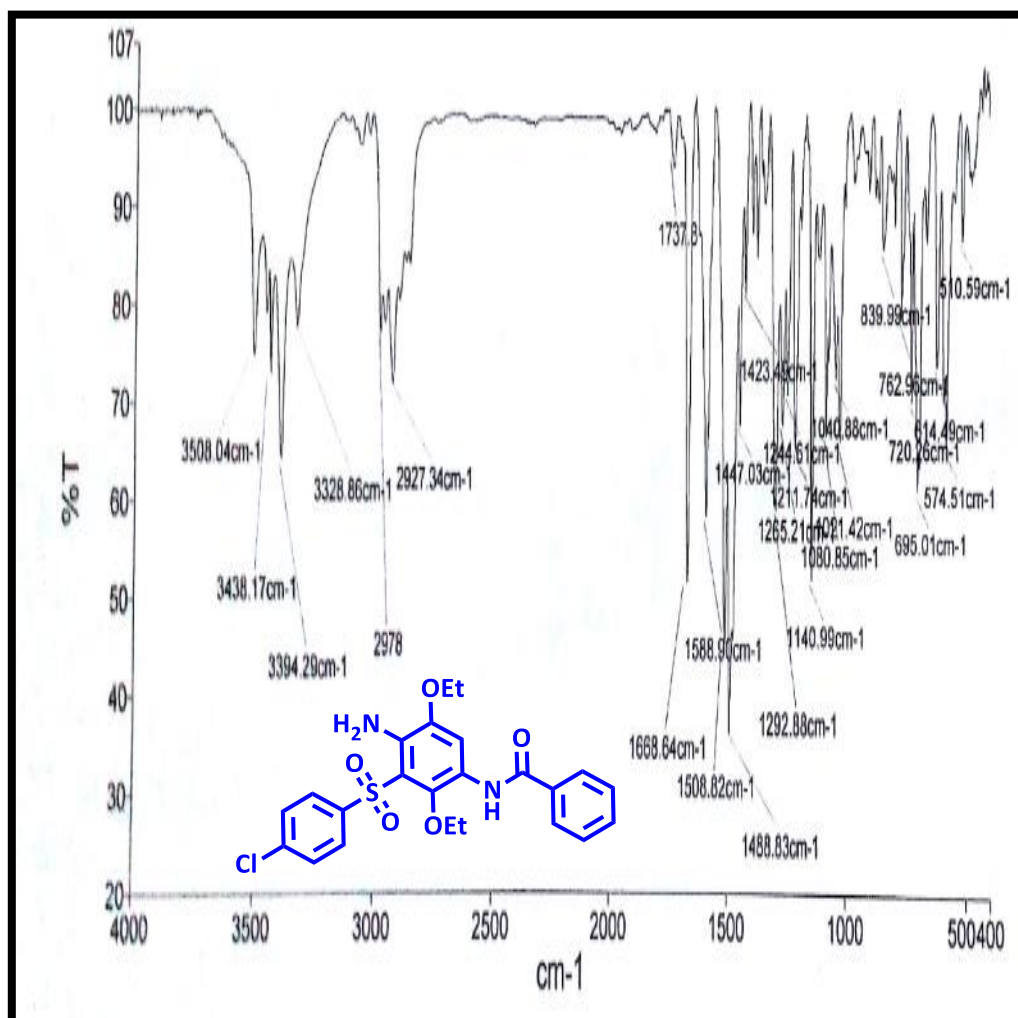

Mass spectrum of **3c**

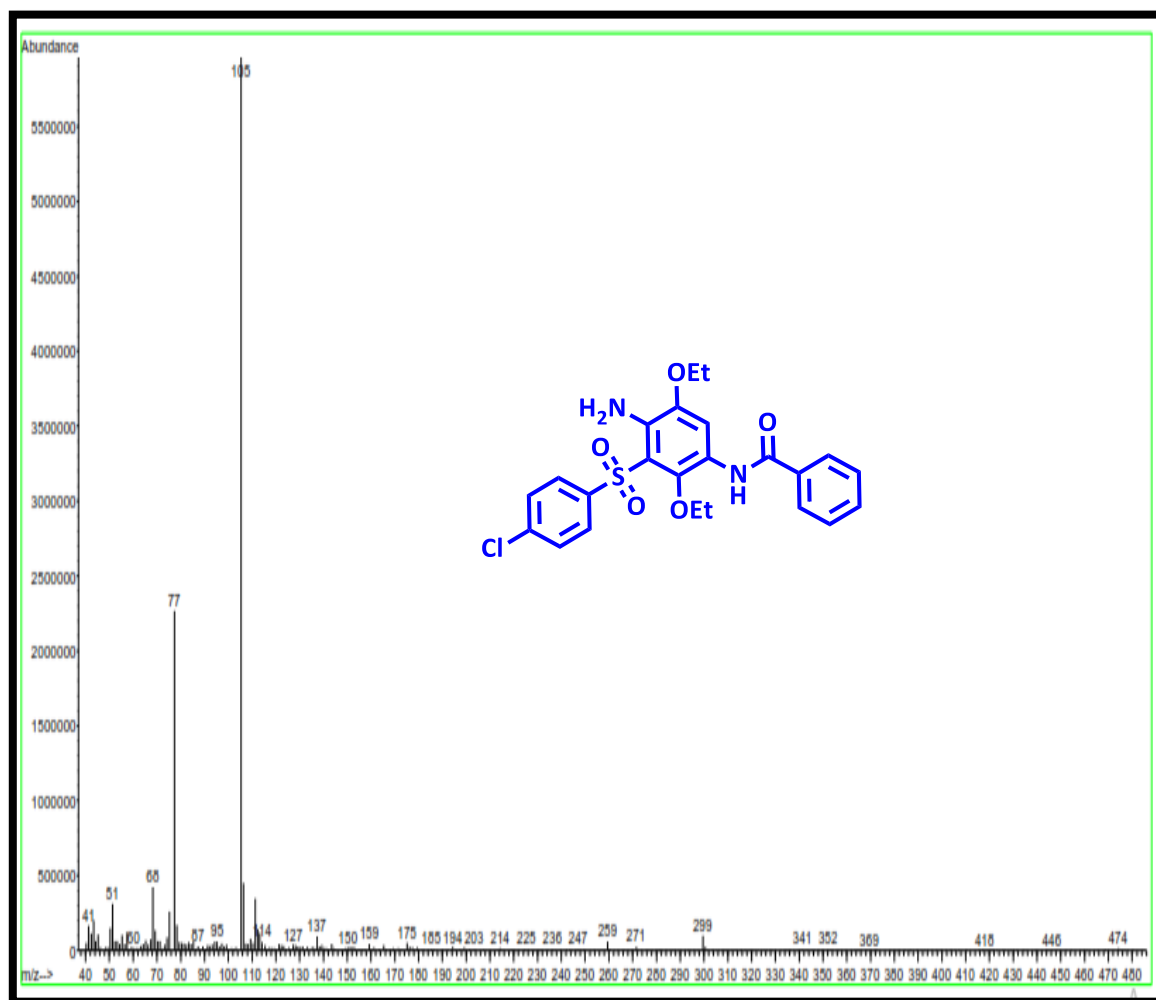

<sup>1</sup>H NMR spectrum of **3c**

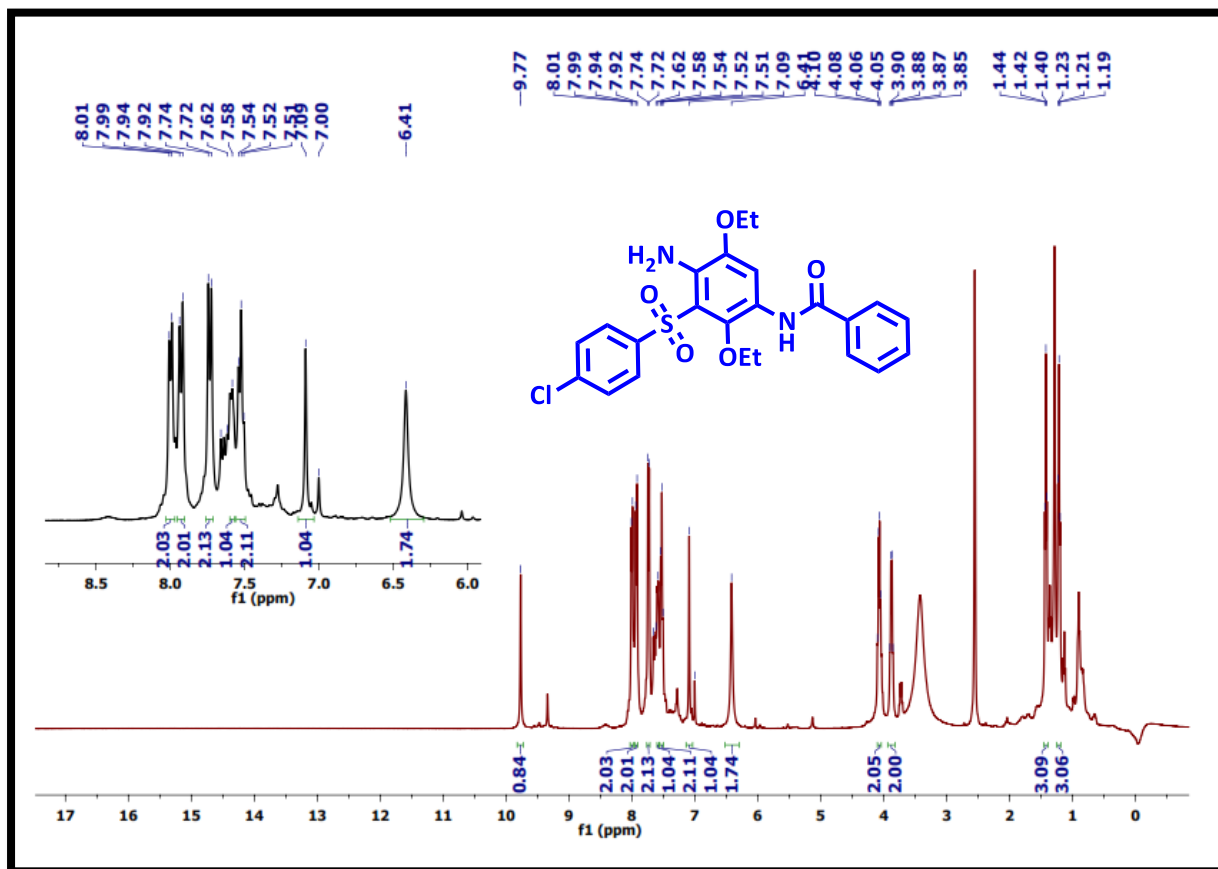

<sup>13</sup>C NMR spectrum of **3c**

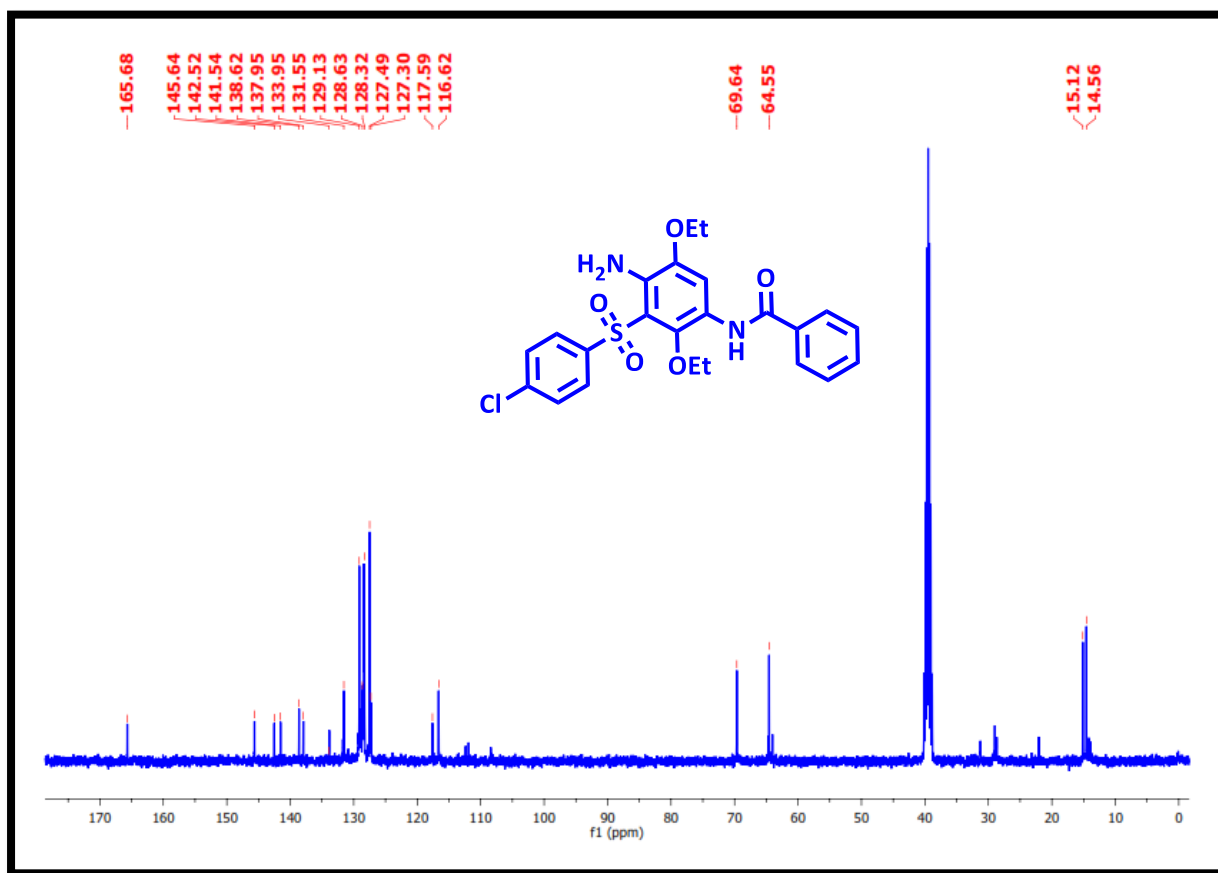

Supplement: c9nj00815b1.pdf [file c9nj00815b1.pdf]
